# Supplementary material
Source: PubMed Central journal article supplement (PMC5613999)
Supplement: PEDS_20170203SupplementaryData.pdf [file PEDS_20170203SupplementaryData.pdf]

## Supplemental Information

**SUPPLEMENTAL TABLE 4** Registry Pediatric ED Overall Visits by Race and Ethnicity and Site, 2013

|                                               | Site           |                |                |                |                |                |                | Total           |
|-----------------------------------------------|----------------|----------------|----------------|----------------|----------------|----------------|----------------|-----------------|
|                                               | 1              | 2              | 3              | 4              | 5              | 6              | 7              |                 |
| Total No. Visits                              | 77 083         | 29 385         | 64 296         | 38 562         | 88 069         | 82 562         | 33 997         | 413 954         |
| Racial and Ethnic Breakdown of Visits by Site |                |                |                |                |                |                |                |                 |
| NH white                                      | 6835 (8.9%)    | 17 400 (59.2%) | 17 047 (26.5%) | 25 714 (66.7%) | 19 662 (22.3%) | 36 450 (44.1%) | 123 (0.4%)     | 123 231 (29.8%) |
| NH black                                      | 46 567 (60.4%) | 210 (0.7%)     | 10 456 (16.3%) | 4808 (12.5%)   | 53 853 (61.1%) | 35 020 (42.4%) | 32 984 (97.0%) | 183 898 (44.4%) |
| Hispanic                                      | 17 788 (23.1%) | 7097 (24.2%)   | 29 260 (45.5%) | 4103 (10.6%)   | 6610 (7.5%)    | 3919 (4.7%)    | 666 (2.0%)     | 69 443 (16.8%)  |
| NH other                                      | 3477 (4.5%)    | 2187 (7.4%)    | 6389 (9.9%)    | 3452 (9.0%)    | 7809 (8.9%)    | 6229 (7.5%)    | 118 (0.3%)     | 29 661 (7.2%)   |
| Missing                                       | 2416 (3.1%)    | 2491 (8.5%)    | 1144 (1.8%)    | 485 (1.3%)     | 135 (0.2%)     | 944 (1.1%)     | 106 (0.3%)     | 7721 (1.9%)     |

**SUPPLEMENTAL TABLE 5** ICD-9 Codes Used to Identify Viral and Bacterial ARTIs and Pharyngitis

| Condition       | ICD-9 Code                                                                                                                                                                    |
|-----------------|-------------------------------------------------------------------------------------------------------------------------------------------------------------------------------|
| Viral ARTIs     | 460                                                                                                                                                                           |
|                 | 465, 0.0, 0.8, 0.9                                                                                                                                                            |
|                 | 466, 0.0, 0.1, 0.11, 0.19                                                                                                                                                     |
|                 | 487.1                                                                                                                                                                         |
|                 | 490                                                                                                                                                                           |
| Bacterial ARTIs | 034.1                                                                                                                                                                         |
|                 | 288.0, 0.00, 0.01, 0.02, 0.03, 0.04, 0.09                                                                                                                                     |
|                 | 381, 0.0, 0.00, 0.01, 0.02, 0.03, 0.04, 0.05, 0.06, 0.1, 0.10, 0.19, 0.2, 0.20, 0.29, 0.3, 0.4, 0.5, 0.50, 0.51, 0.52, 0.6, 0.60, 0.61, 0.62, 0.63, 0.7, 0.8, 0.81, 0.89, 0.9 |
|                 | 382, 0.0, 0.00, 0.01, 0.02, 0.1, 0.2, 0.3, 0.4, 0.9                                                                                                                           |
|                 | 461, 0.0, 0.1, 0.2, 0.3, 0.8, 0.9                                                                                                                                             |
|                 | 473, 0.0, 0.1, 0.2, 0.3, 0.8, 0.9                                                                                                                                             |
|                 | 481                                                                                                                                                                           |
|                 | 482, 0.0, 0.1, 0.2, 0.3, 0.30, 0.31, 0.32, 0.39, 0.4, 0.40, 0.41, 0.42, 0.49, 0.8, 0.81, 0.82, 0.83, 0.84, 0.89, 0.9                                                          |
|                 | 483, 0.0, 0.1, 0.8                                                                                                                                                            |
|                 | 484, 0.1, 0.3, 0.5, 0.6, 0.7, 0.8                                                                                                                                             |
|                 | 485                                                                                                                                                                           |
| Pharyngitis     | 486                                                                                                                                                                           |
|                 | 034.0                                                                                                                                                                         |
|                 | 462                                                                                                                                                                           |
|                 | 463                                                                                                                                                                           |
